# Supplementary material
Source: MDPI journal article supplement (https://www.mdpi.com/2073-4344/9/4/360)
Supplement: s1 [file s1]

## Optimization of photocatalytic degradation of Acid Blue 113 and Acid Red 88 textile dyes in a UV-C/TiO<sub>2</sub> suspension system: Application of Response Surface Methodology (RSM)

Soroosh Mortazavian<sup>1</sup>, Ali Saber<sup>2,\*</sup> and David E. James<sup>2</sup>

<sup>1</sup> Department of Mechanical Engineering, University of Nevada, Las Vegas, Las Vegas, NV 89154, USA; mortazav@unlv.nevada.edu

<sup>2</sup> Department of Civil and Environmental Engineering and Construction, University of Nevada, Las Vegas, Las Vegas, NV 89154, USA; dave.james@unlv.edu

\* Correspondence: sabersic@unlv.nevada.edu; Tel.: (+1 702-285-2836)

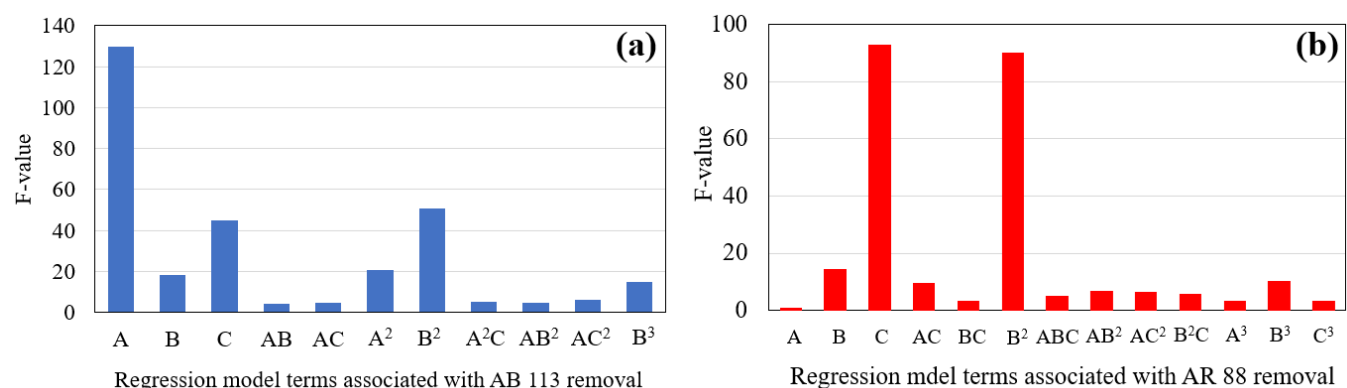

**Figure S1.** Computed F-values for significant ( $p < 0.05$ ) regression model terms associated with photocatalytic degradation of (a) AB 113 (a), and (b) AR 88 [A: pH, B: TiO<sub>2</sub> dose (g/L), and C: Initial dye concentration: (mg/L)].

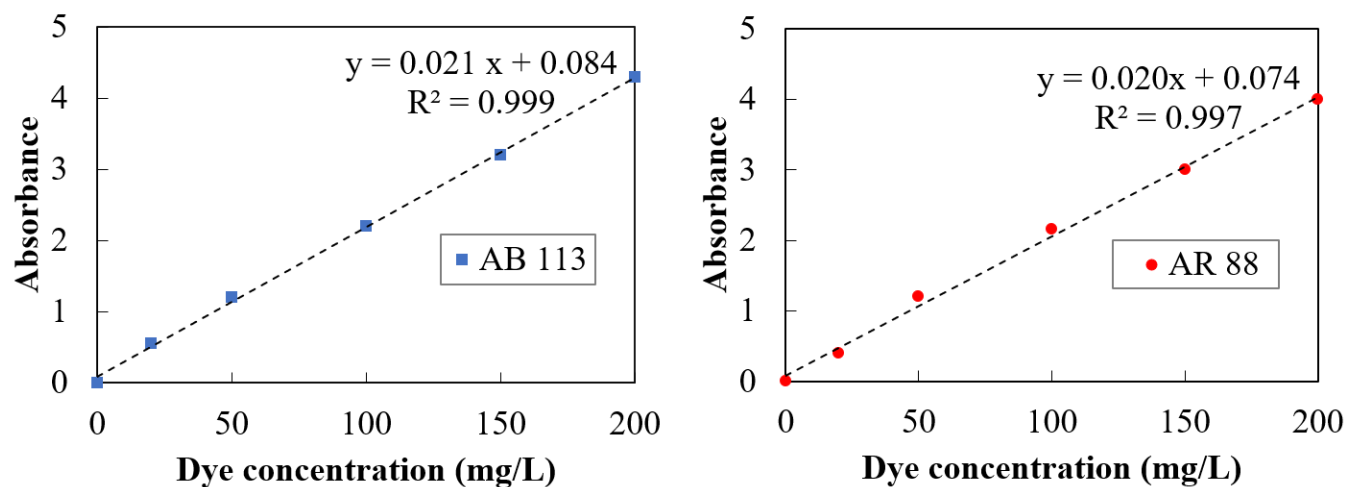

**Figure S2.** Absorbance versus dye concentrations graphs for (a) AB 113, and (b) AR 88, showing linearity of data for both dyes in the studied dye concentration between 0 mg/L to 200 mg/L.
